# Supplementary material
Source: ML conference proceedings conference paper supplement (https://proceedings.neurips.cc/paper_files/paper/2019/hash/c36b1132ac829ece87dda55d77ac06a4-Abstract.html)
Supplement: Supplementary file [file c36b1132ac829ece87dda55d77ac06a4-Supplemental.zip]

## A Proofs for Section 2

We provide the proofs of the claims made in Section 2.

### A.1 Tsallis $\gamma$ -max-divergence gives tighter stability for larger $\gamma$

**Proposition A.1.** *Fix a distribution pair  $P$  and  $Q$ . Then the function  $D_{\infty, \gamma}(P, Q)$  is non-decreasing in  $\gamma$  for  $\gamma > 0$ .*

*Proof.* Since  $D_{\infty, \gamma}(P, Q) \geq 0$  (obvious by setting  $B$  to be the entire space in (2)), we can fix a set  $B$  with  $P(B) \geq Q(B)$  and simply show that, for  $0 < \gamma \leq \gamma'$ ,

$$\log_{\gamma} P(B) - \log_{\gamma} Q(B) \leq \log_{\gamma'} P(B) - \log_{\gamma'} Q(B).$$

This is equivalent to

$$\log_{\gamma} P(B) - \log_{\gamma'} P(B) \leq \log_{\gamma} Q(B) - \log_{\gamma'} Q(B).$$

Since  $0 \leq Q(B) \leq P(B) \leq 1$ , the above inequality will follow if we establish that the function

$$f(p) = \log_{\gamma} p - \log_{\gamma'} p$$

is non-increasing for  $p \in (0, 1]$ . We can indeed verify this by taking the derivative

$$f'(p) = p^{-\gamma} - p^{-\gamma'},$$

which is non-positive since  $p \leq 1$  and  $\gamma' \geq \gamma > 0$ .  $\square$

### A.2 Post-processing inequality under deterministic mappings

**Proposition A.2.** *Let  $X, Y$  be random variables taking values in some space  $\mathcal{B}$  and let  $f : \mathcal{B} \rightarrow \mathcal{B}'$  be a measurable function. Then  $D_{\infty, \gamma}(f(X), f(Y)) \leq D_{\infty, \gamma}(X, Y)$ .*

*Proof.* Fix an arbitrary set  $B \subseteq \mathcal{B}'$ . We have

$$\begin{aligned} \log_{\gamma} \mathbb{P}(f(X) \in B) - \log_{\gamma} \mathbb{P}(f(Y) \in B) &= \log_{\gamma} \mathbb{P}(X \in f^{-1}(B)) - \log_{\gamma} \mathbb{P}(Y \in f^{-1}(B)) \\ &\leq D_{\infty, \gamma}(X, Y). \end{aligned} \quad \square$$

## B Proofs for Section 3

This section contains full proofs that are either skipped or simplified in Section 3.

### B.1 Key Lemma

We first record as a lemma the following characterization of  $\delta$ -approximate max-divergence provided by Dwork et al. [16].

**Lemma B.1.** [16, Lemma 2.1.1] *Let  $Y, Z$  be random variables over  $\mathcal{B}$ . Then,  $D_{\infty}^{\delta}(Y, Z) \leq \epsilon$ , if and only if there exists a random variable  $Y'$  such that*

- (i)  $\sup_{B \subseteq \mathcal{B}} |\mathbb{P}[Y \in B] - \mathbb{P}[Y' \in B]| \leq \delta$  and
- (ii)  $D_{\infty}(Y', Z) \leq \epsilon$ .

In short, we can alter  $Y$  into  $Y'$  by moving no more than  $\delta$  probability mass from  $\{b \in \mathcal{B} : \mathbb{P}[Y = b] > e^{\epsilon} \mathbb{P}[Z = b]\}$  to  $\{b \in \mathcal{B} : \mathbb{P}[Y = b] \leq e^{\epsilon} \mathbb{P}[Z = b]\}$  such that  $D_{\infty}(Y', Z)$  is bounded. Then in the following lemma, we can show that closeness in max-divergence means that expectations of bounded functions are close. In the result below, when  $\delta = 0$ , we are allowed to have  $F = \infty$ .

**Lemma B.2.** *Let  $Y$  and  $Z$  be random variables taking values in  $\mathcal{B}$  such that  $D_{\infty}^{\delta}(Y, Z) \leq \epsilon$ . Then for any non-negative function  $f : \mathcal{B} \rightarrow [0, F]$ , we have*

$$\mathbb{E}[f(Y)] \leq e^{\epsilon} \mathbb{E}[f(Z)] + \delta F.$$

*Proof.* Let  $Y'$  be the random variable satisfying the conditions of Lemma B.1. Then we can write

$$\begin{aligned}\mathbb{E}[f(Y)] &= \int_{\mathcal{B}} f(b)\mathbb{P}[Y = b]db \\ &= \int_{\mathcal{B}} f(b)\mathbb{P}[Y' = b]db + \int_{\mathcal{B}} f(b)(\mathbb{P}[Y = b] - \mathbb{P}[Y' = b])db \\ &\leq \int_{\mathcal{B}} f(b)e^\epsilon \mathbb{P}[Z = b]db + F|\mathbb{P}[Y \in B] - \mathbb{P}[Y' \in B]| \\ &\leq e^\epsilon \mathbb{E}[f(Z)] + \delta F,\end{aligned}$$

where  $B = \{b \in \mathcal{B} \mid \mathbb{P}[Y = b] \geq \mathbb{P}[Y' = b]\}$ . Here we applied Lemma B.1(ii) for the first inequality and (i) for the second.  $\square$

Now we are ready to prove our key lemma.

**Lemma 3.1.** *Consider the loss-only setting with loss functions bounded by  $B$ . Let  $\mathcal{A}$  be  $\text{DiffStable}(D_\infty^\delta)$  at level  $\epsilon \leq 1$ . Then the expected regret of  $\mathcal{A}$  is at most*

$$2\epsilon L_T^* + 3\mathbb{E}[\text{Regret}(\mathcal{A}^+)_T] + \delta BT,$$

where  $\mathcal{A}^+$  is a fictitious algorithm plays the distribution  $\mathcal{A}(\ell_{1:t})$  at time  $t$  (i.e.,  $\mathcal{A}^+$  plays at time  $t$  what  $\mathcal{A}$  would play at time  $t + 1$ ).

*Proof.* Let  $x_t$  denote the random variable distributed as  $\mathcal{A}(\ell_{1:t-1})$ . Using Lemma B.2, we have for every  $t$ ,  $\mathbb{E}[\ell_t(x_t)] \leq e^\epsilon \mathbb{E}[\ell_t(x_{t+1})] + \delta B$ . By summing over  $t$ , we have

$$\mathbb{E}\left[\sum_{t=1}^T \ell_t(x_t)\right] \leq e^\epsilon \mathbb{E}\left[\sum_{t=1}^T \ell_t(x_{t+1})\right] + \delta BT \leq e^\epsilon (L_T^* + \mathbb{E}[\text{Regret}(\mathcal{A}^+)_T]) + \delta BT.$$

To bound the expected regret of  $\mathcal{A}$ , we subtract  $L_T^*$  from each side, which gives us the bound

$$(e^\epsilon - 1)L_T^* + e^\epsilon \mathbb{E}[\text{Regret}(\mathcal{A}^+)_T] + \delta BT.$$

Then we complete the proof using the upper bounds  $e^\epsilon \leq 1 + 2\epsilon \leq 3$ , which hold for  $\epsilon \leq 1$ .  $\square$

## B.2 Online convex optimization

**Theorem 3.2** (First-order regret in OCO). *Suppose we are in the loss-only OCO setting. Let  $\mathcal{X} \subset \mathbb{R}^d$ ,  $\|\mathcal{X}\|_2 \leq D$  and let all loss functions be bounded by  $B$ . Further assume that  $\|\nabla \ell_t(x)\|_2 \leq \beta$ ,  $\lambda_{\max}(\nabla^2 \ell_t(x)) \leq \gamma$  and that the Hessian matrix  $\nabla^2 \ell_t(x)$  has rank at most one, for every  $t$  and  $x \in \mathcal{X}$ . Then, the expected regret of Algorithm 1 is at most  $O(\sqrt{L_T^*}(\gamma D^2 + \beta d D))$  and  $O\left(\sqrt{L_T^*}(\gamma D^2 + D\sqrt{d(\beta^2 \log(BT))})\right)$  with Gamma and Gaussian perturbations, respectively.*

*Proof.* When analyzing the expected regret against an oblivious adversary, we may assume that the random vector  $b$  is just drawn once and reused every round. By definition of  $x_t$  and induction on  $t$ , we get for any  $x \in \mathcal{X}$ ,

$$\frac{\gamma}{\epsilon} \|x_2\|_2^2 + \langle b, x_2 \rangle + \sum_{s=1}^t \ell_s(x_{s+1}) \leq \frac{\gamma}{\epsilon} \|x\|_2^2 + \langle b, x \rangle + \sum_{s=1}^t \ell_s(x).$$

From the case when  $t = T$ , we obtain

$$\sum_{t=1}^T \ell_t(x_{t+1}) \leq \min_{x \in \mathcal{X}} \sum_{t=1}^T \ell_t(x) + \frac{\gamma}{\epsilon} \|x\|_2^2 + \langle b, x - x_2 \rangle \leq L_T^* + \frac{\gamma}{\epsilon} \|x_T^*\|_2^2 + \langle b, x_T^* - x_2 \rangle.$$

This result is often referred to as the “be-the-leader lemma.” Then by taking expectation and applying the Cauchy-Schwartz inequality, we get

$$\mathbb{E}\left[\sum_{t=1}^T \ell_t(x_{t+1})\right] \leq L_T^* + \frac{\gamma}{\epsilon} D^2 + 2D\mathbb{E}\|b\|_2.$$

From the DP result by Kifer et al. [23, Theorem 2], we can infer that  $D_\infty(x_t, x_{t+1}) \leq \epsilon$  when using the Gamma distribution and  $D_\infty^\delta(x_t, x_{t+1}) \leq \epsilon$  when using the Gaussian distribution. This means that Algorithm 1 enjoys the one-step differential stability w.r.t.  $D_\infty$  (resp.  $D_\infty^\delta$ ) in the Gamma (resp. Gaussian) case. Using Lemma 3.1, we can deduce that the expected regret of Algorithm 1 is at most

$$2\epsilon L_T^* + \frac{3\gamma}{\epsilon} D^2 + 6D\mathbb{E}\|b\|_2 + \delta BT, \quad (5)$$

where  $\delta$  becomes zero when using the Gamma distribution. We have  $\|b\|_2 \sim \text{Gamma}(d, \frac{\epsilon}{2\beta})$  when using the Gamma distribution, which gives  $\mathbb{E}\|b\|_2 = \frac{2\beta d}{\epsilon}$ . In the case of the Gaussian distribution, we have  $\mathbb{E}\|b\|_2 \leq \sqrt{\mathbb{E}\|b\|_2^2} = \frac{\sqrt{d(\beta^2 \log \frac{2}{\delta} + 4\epsilon)}}{\epsilon}$ . Plugging these results in (5) and optimizing  $\epsilon$  (setting  $\delta = \frac{1}{BT}$  for the Gaussian case) prove the desired bound.  $\square$

### B.3 Differential consistency and one-step differential stability

We first prove the claim that we made in Section 3.3.1.

**Proposition B.3.** *Suppose  $\tilde{\Phi}(L)$  is of the form  $\min_p \langle L, p \rangle + F(p)$  for a separable  $F(p) = \sum_{i=1}^N f(p_i)$  with  $f : (0, \infty) \rightarrow \mathbb{R}$  differentiable and strictly convex. Then, the matrix  $-\nabla^2 \tilde{\Phi}(L)$  is POD for any  $L$ .*

*Proof.* We have the gradient formula

$$g(L) = \nabla \tilde{\Phi}(L) = \arg \min_{p \in \Delta^{N-1}} \sum_{i=1}^N p_i L_i + \sum_{i=1}^N f(p_i).$$

Let  $\lambda = \lambda(L)$  be the Lagrange multiplier for the constraint  $\sum_i p_i = 1$ . We do not have to worry about the constraint  $p_i \geq 0$  since we have assumed that the domain of  $f$  is  $(0, \infty)$ . Setting the derivative of the Lagrangian

$$\sum_i p_i L_i + \sum_i f(p_i) + \lambda(\sum_i p_i - 1)$$

w.r.t.  $p_i$  to zero gives us

$$L_i + f'(p_i) + \lambda = 0. \quad (6)$$

Taking the derivatives w.r.t.  $L_i$  and  $L_j$  for  $j \neq i$  gives us

$$\begin{aligned} f''(p_i) \frac{\partial p_i}{\partial L_i} &= -1 - \frac{\partial \lambda}{\partial L_i} \\ f''(p_i) \frac{\partial p_i}{\partial L_j} &= -\frac{\partial \lambda}{\partial L_j}. \end{aligned}$$

Now note that  $f'' > 0$  ( $f$  strictly convex) and  $\nabla_{ij}^2 \tilde{\Phi}(L) = \frac{\partial p_i}{\partial L_j}$ . The proof will therefore be complete if we can claim that  $-\frac{\partial \lambda}{\partial L_i} \in (0, 1)$ . Let us next prove this claim. We can write (6) as

$$p_i = (f^*)'(-\lambda - L_i),$$

where  $f^*$  is the Fenchel conjugate of  $f$  (and therefore  $f'$  and  $(f^*)'$  are inverses of each other). Plugging this into the constraint  $\sum_i p_i = 1$  gives

$$\sum_i (f^*)'(-\lambda - L_i) = 1.$$

Now differentiating w.r.t.  $L_i$  gives us

$$(f^*)''(-\lambda - L_i) \left( -\frac{\partial \lambda}{\partial L_i} - 1 \right) + \sum_{j \neq i} (f^*)''(-\lambda - L_j) \left( -\frac{\partial \lambda}{\partial L_i} \right) = 0,$$

which upon rearranging yields

$$-\frac{\partial \lambda}{\partial L_i} = \frac{(f^*)''(-\lambda - L_i)}{\sum_j (f^*)''(-\lambda - L_j)}.$$

Since  $f$  is smooth,  $f^*$  is strictly convex and therefore  $(f^*)'' > 0$  which proves  $-\frac{\partial \lambda}{\partial L_i} \in (0, 1)$ .  $\square$

Table 1: The parameter settings for the distributions that provide  $(1, \epsilon)$ -differential consistency of the induced potentials while keeping  $\mathbb{E}_{Z_1, \dots, Z_N \sim \mathcal{D}} \max_i Z_i = O(\log N/\epsilon)$  [2]. Distributions marked with a \* have to be modified slightly to ensure the differential consistency.

| Distribution $\mathcal{D}$ | Parameter choice           |
|----------------------------|----------------------------|
| Gamma( $\alpha, \beta$ )   | $\alpha = 1, \beta = 1$    |
| Gumbel( $\mu, \beta$ )     | $\mu = 0, \beta = 1$       |
| Fréchet ( $\alpha > 1$ )   | $\alpha = \log N$          |
| Weibull*( $\lambda, k$ )   | $\lambda = 1, k = 1$       |
| Pareto*( $x_m, \alpha$ )   | $x_m = 1, \alpha = \log N$ |

Next we prove Proposition 3.5.

**Proposition 3.5** (Differential consistency implies one-step differential stability). *Suppose  $\tilde{\Phi}(L)$  is of the form  $\mathbb{E}[\min_p \langle a, p \rangle + F(p, Z)]$  and  $\gamma \geq 1$ . If  $\tilde{\Phi}$  is  $(\gamma, \epsilon)$ -differentially consistent and  $-\nabla^2 \tilde{\Phi}$  is always POD, the GBPA using  $\tilde{\Phi}$  as potential is  $\text{DiffStable}(D_{\infty, \gamma}, \|\cdot\|_{\infty})$  at level  $2\epsilon$ .*

*Proof.* First, note that by the POD property, the second derivative vector  $\nabla_i^2 \tilde{\Phi} = (\nabla_{i1}^2 \tilde{\Phi}, \dots, \nabla_{iN}^2 \tilde{\Phi})$  satisfies that the  $i$ -th coordinate is non-positive and the rest are non-negative. Next, because the entries in the gradient sum to a constant (it is a probability vector), we know that the coordinate of the second derivative vector add up to 0 [1]. From this, we can write  $\|\nabla_i^2 \tilde{\Phi}\|_1 = -2\nabla_{ii}^2 \tilde{\Phi}$ . Let the cumulative sum of losses so far be  $L$  and the new loss vector be  $\ell$ . For  $P = \nabla \tilde{\Phi}(L)$ ,  $Q = \nabla \tilde{\Phi}(L + \ell)$ , we want to show that  $D_{\infty, \gamma}(P, Q) \leq 2\epsilon \|\ell\|_{\infty}$ . To this end, fix a subset  $S \subseteq [N]$  and define  $q_S(u) = \sum_{i \in S} \nabla_i \tilde{\Phi}(L + \ell - u\ell)$  for  $u \in [0, 1]$ . Its derivative can be written as

$$\begin{aligned}
q'_S(u) &= \sum_{i \in S} \langle \nabla_i^2 \tilde{\Phi}(L + \ell - u\ell), -\ell \rangle \\
&\leq \sum_{i \in S} \|\nabla_i^2 \tilde{\Phi}(L + \ell - u\ell)\|_1 \|\ell\|_{\infty} = \sum_{i \in S} -2\nabla_{ii}^2 \tilde{\Phi}(L + \ell - u\ell) \|\ell\|_{\infty} \\
&\leq 2\epsilon \|\ell\|_{\infty} \sum_{i \in S} \left( \nabla_i \tilde{\Phi}(L + \ell - u\ell) \right)^{\gamma} \\
&\leq 2\epsilon \|\ell\|_{\infty} \left( \sum_{i \in S} \nabla_i \tilde{\Phi}(L + \ell - u\ell) \right)^{\gamma} = 2\epsilon \|\ell\|_{\infty} (q_S(u))^{\gamma}.
\end{aligned}$$

The first inequality follows from duality of  $\ell_1, \ell_{\infty}$  norms. The second inequality is from our differential consistency assumption. The last inequality holds because gradient has non-negative entries and  $\|\cdot\|_{\gamma} \leq \|\cdot\|_1$  for  $\gamma \geq 1$ . It follows that for any  $u \in [0, 1]$ , we have

$$\frac{q'_S(u)}{(q_S(u))^{\gamma}} = \frac{d}{du} \log_{\gamma}(q_S(u)) \leq 2\epsilon \|\ell\|_{\infty},$$

and therefore

$$\begin{aligned}
\log_{\gamma}(P(S)) - \log_{\gamma}(Q(S)) &= \log_{\gamma} q_S(1) - \log_{\gamma} q_S(0) = \int_0^1 \frac{d}{du} \log_{\gamma}(q_S(u)) du \\
&\leq 2\epsilon \|\ell\|_{\infty}.
\end{aligned}$$

□

Now we are ready to prove the first order bound of FTPL in the experts problem.

**Theorem 3.6** (First-order bound for experts via FTPL). *For the loss-only experts setting, FTPL with Gamma, Gumbel, Fréchet, Weibull, and Pareto perturbations, with a proper choice of distribution parameters, all achieve the optimal  $O(\sqrt{L_T^* \log N} + \log N)$  expected regret.*

*Proof.* Recall that the FTPL algorithm uses the potential  $\tilde{\Phi}_{\mathcal{D}}(L) = \mathbb{E}_{Z_1, \dots, Z_N \sim \mathcal{D}} \min_i (L_i - Z_i)$ . Abernethy et al. [2] show that all the listed distributions, after suitable scaling, have this potential  $\tilde{\Phi}_{\mathcal{D}}$   $(1, \epsilon)$ -differentially consistent and  $\mathbb{E}\|Z\|_{\infty} = O(\log N/\epsilon)$  at the same time (for parameter choices,

---

**Algorithm 4** GBPA for multi-armed bandits problem

---

- 1: **Input:** Concave potential  $\tilde{\Phi} : \mathbb{R}^N \rightarrow \mathbb{R}$ , with  $\nabla \tilde{\Phi} \in \Delta^{N-1}$
  - 2: Set  $\hat{L}_0 = 0 \in \mathbb{R}^N$
  - 3: **for**  $t = 1$  to  $T$  **do**
  - 4:   **Sampling:** Choose  $i_t \in [N]$  according to distribution  $p_t = \nabla \tilde{\Phi}(\hat{L}_{t-1}) \in \Delta^{N-1}$
  - 5:   **Loss:** Incur loss  $\ell_{t,i_t}$  and observe this value
  - 6:   **Estimation:** Compute an estimate of loss vector,  $\hat{\ell}_t = \frac{\ell_{t,i_t}}{p_{t,i_t}} \mathbf{e}_{i_t}$
  - 7:   **Update:**  $\hat{L}_t = \hat{L}_{t-1} + \hat{\ell}_t$
  - 8: **end for**
- 

see Table 1). Then Proposition 3.5 provides that FTPL with any of the listed distributions is one-step differentially stable with respect to  $\|\cdot\|_\infty$  and  $D_\infty$  at level  $2\epsilon$ . Using the “be-the-leader lemma” (as in the proof of Theorem 3.2), we have

$$\mathbb{E}\left[\sum_{t=1}^T \ell_{t,i_{t+1}}\right] - L_T^* \leq 2\mathbb{E}\|Z\|_\infty = O(\log N/\epsilon).$$

Applying Lemma 3.1 with  $\epsilon = \min(\sqrt{\log N/L_T^*}, 1)$  completes the proof.  $\square$

## C Details and proofs for Section 4

Here we present missing parts in Section 4. We start by presenting the GBPA for multi-armed bandits in Algorithm 4.

### C.1 Proof of Lemma 4.1

We will prove the following slightly more general lemma. Lemma 4.1 follows by setting  $\tau = 0$  and lower bounding  $F(p_0, Z)$  by  $\min_p F(p, Z)$ .

**Lemma C.1.** *Suppose the full information GBPA uses a potential of the form  $\tilde{\Phi}(L) = \mathbb{E}[\min_p \langle L, p \rangle + F(p, Z)]$  and  $\gamma \in [1, 2]$ . If the full information GBPA is  $\text{DiffStable}(D_\infty, \gamma, \|\cdot\|_\infty)$  at level  $\epsilon$ , then the expected regret of Algorithm 4 can be bounded as*

$$\mathbb{E}\left[\sum_{t=1}^T \ell_{t,i_t}\right] - L_T^* \leq \epsilon \mathbb{E}\left[\sum_{t=1}^T \hat{\ell}_{t,i_t}^\gamma p_{t,i_t}^\gamma\right] + \mathbb{E}\left[\max_{p \in \Delta_\tau} F(p, Z) - F(p_0, Z)\right] + \tau NT,$$

where  $\Delta_\tau = \{p \in \mathbb{R}^N : p_i \geq \tau, \sum_i p_i = 1\}$ .

We will prove this lemma by proving two helper lemmas (Lemma C.2 and Lemma C.3 below) that, when combined, immediately yield the desired result.

**Lemma C.2.** *Suppose the full information GBPA uses a potential of the form  $\tilde{\Phi}(L) = \mathbb{E}[\min_p \langle L, p \rangle + F(p, Z)]$ . Then, we have*

$$\mathbb{E}\left[\sum_{t=1}^T \ell_{t,i_t}\right] - L_T^* \leq \mathbb{E}\left[\sum_{t=1}^T \langle p_t - p_{t+1}, \hat{\ell}_t \rangle\right] + \mathbb{E}\left[\max_{p \in \Delta_\tau} F(p, Z) - F(p_0, Z)\right] + \tau NT$$

where  $\Delta_\tau = \{p \in \mathbb{R}^N : p_i \geq \tau, \sum_i p_i = 1\}$ .

*Proof.* Fix the source of internal randomness used by Algorithm 4 to sample  $i_t \sim p_t$ . This fixes all the estimated loss vectors  $\hat{\ell}_t$ . The full information GBPA algorithm will deterministically generate the same sequence  $p_t$  of probabilities on this estimated loss sequence using the rule  $p_t = \nabla \tilde{\Phi}(\hat{L}_{t-1})$ . We have

$$\sum_{t=1}^T \langle p_t, \hat{\ell}_t \rangle = \sum_{t=1}^T \langle p_t - p_{t+1}, \hat{\ell}_t \rangle + \sum_{t=1}^T \langle p_{t+1}, \hat{\ell}_t \rangle. \quad (7)$$

Let us focus on the second summation:

$$\begin{aligned}
\sum_{t=1}^T \langle p_{t+1}, \hat{\ell}_t \rangle &= \sum_{t=1}^T \langle \mathbb{E}[\arg \min_p \langle \hat{L}_t, p \rangle + F(p, Z)], \hat{\ell}_t \rangle \\
&= \mathbb{E}[\sum_{t=1}^T \langle \arg \min_p \langle \hat{L}_t, p \rangle + F(p, Z), \hat{\ell}_t \rangle] \\
&\leq \mathbb{E}[F(p, Z) - F(p_0, Z)] + \sum_{t=1}^T \langle p, \hat{\ell}_t \rangle,
\end{aligned} \tag{8}$$

where the last inequality is true for any  $p$  due to the “be-the-leader” argument. Note that the expectations above are only w.r.t.  $Z$  since  $\hat{\ell}_t$  are still fixed. Combining (7) and (8) and taking expectations over the internal randomness of the bandit algorithm gives, for any  $p \in \Delta_\tau$ ,

$$\begin{aligned}
\mathbb{E}[\sum_{t=1}^T \langle p_t, \hat{\ell}_t \rangle] &\leq \mathbb{E}[\sum_{t=1}^T \langle p_t - p_{t+1}, \hat{\ell}_t \rangle] + \mathbb{E}[F(p, Z) - F(p_0, Z)] + \mathbb{E}[\sum_{t=1}^T \langle p, \hat{\ell}_t \rangle] \\
&= \mathbb{E}[\sum_{t=1}^T \langle p_t - p_{t+1}, \hat{\ell}_t \rangle] + \mathbb{E}[F(p, Z) - F(p_0, Z)] + \sum_{t=1}^T \langle p, \ell_t \rangle \\
&\leq \mathbb{E}[\sum_{t=1}^T \langle p_t - p_{t+1}, \hat{\ell}_t \rangle] + \mathbb{E}[\max_{p \in \Delta_\tau} F(p, Z) - F(p_0, Z)] + \sum_{t=1}^T \langle p, \ell_t \rangle.
\end{aligned}$$

To finish the proof, note that  $\langle p_t, \hat{\ell}_t \rangle = \ell_{t, i_t}$  and

$$\min_{p \in \Delta_\tau} \sum_{t=1}^T \langle p, \ell_t \rangle \leq \min_p \sum_{t=1}^T \langle p, \ell_t \rangle + \tau NT = L_T^* + \tau NT.$$

because for any  $p' \in \Delta^{N-1}$ , there is a  $p \in \Delta_\tau$  such that  $\|p' - p\|_1 \leq \tau N$ .  $\square$

**Lemma C.3.** Suppose  $1 \leq \gamma \leq 2$ . If the full information GBPA is  $\text{DiffStable}(D_{\infty, \gamma}, \|\cdot\|_\infty)$  at level  $\epsilon$ . Then, we have

$$\langle p_t - p_{t+1}, \hat{\ell}_t \rangle \leq \epsilon \hat{\ell}_{t, i_t}^2 p_{t, i_t}^\gamma.$$

*Proof.* First let us consider the case  $\gamma > 1$  first. Recall at most one entry of  $\hat{\ell}_t$  is non-zero. Therefore,  $\langle p_t - p_{t+1}, \hat{\ell}_t \rangle = (p_{t, i_t} - p_{t+1, i_t}) \hat{\ell}_{t, i_t}$ . For the remainder of the proof, let us denote  $p_{t, i_t}$  and  $p_{t+1, i_t}$  by  $p$  and  $p'$  respectively. Also let  $\hat{\ell}$  denote  $\hat{\ell}_{t, i_t}$ . Because of the stability assumption, we know that  $D_{\infty, \gamma}(p_t, p_{t+1}) \leq \epsilon \|\hat{\ell}_t\|_\infty = \epsilon \hat{\ell}$ . Therefore, we have

$$\begin{aligned}
\log_\gamma p - \log_\gamma p' &\leq \epsilon \hat{\ell} \\
\Rightarrow \frac{p^{1-\gamma}}{1-\gamma} - \frac{(p')^{1-\gamma}}{1-\gamma} &\leq \epsilon \hat{\ell} \\
\Rightarrow p' &\geq p \left( 1 + (\gamma - 1) \epsilon \hat{\ell} p^{\gamma-1} \right)^{-\frac{1}{\gamma-1}}.
\end{aligned}$$

Noting that  $(1+x)^{-r} \geq 1 - rx$  for  $r > 0$  and  $x \geq 0$ , we have

$$p' \geq p \left( 1 - \epsilon \hat{\ell} p^{\gamma-1} \right),$$

which proves the lemma for  $1 < \gamma \leq 2$ .

Finally note that the lemma also holds in the case  $\gamma = 1$ , because then we have

$$\begin{aligned}
\log p - \log p' &\leq \epsilon \hat{\ell} \\
\Rightarrow p' &\geq p \exp(-\epsilon \hat{\ell}) \geq p(1 - \epsilon \hat{\ell}).
\end{aligned} \quad \square$$

## C.2 Proof of Theorem 4.2

**Theorem 4.2** (Zero-order and first-order regret bounds for multi-armed bandits). *Algorithm 4 enjoys the following bounds when used with different perturbations/regularizers:*

1. *FTPL with Gamma, Gumbel, Fréchet, Weibull, and Pareto perturbations (with a proper choice of distribution parameters) all achieve near-optimal expected regret of  $O(\sqrt{NT \log N})$ .*
2. *FTRL with Tsallis neg-entropy  $F(p) = -\eta \sum_{i=1}^N p_i \log_\alpha(1/p_i)$  for  $0 < \alpha < 1$  (with a proper choice of  $\eta$ ) achieves optimal expected regret of  $O(\sqrt{NT})$ .*
3. *FTRL with log-barrier regularizer  $F(p) = -\eta \sum_{i=1}^N \log p_i$  (with a proper choice of  $\eta$ ) achieves expected regret of  $O(\sqrt{NL_T^* \log(NT)} + N \log(NT))$ .*

*Proof.* For each of the three parts, we will show that the full info GBPA is  $\text{DiffStable}(D_{\infty, \gamma}, \|\cdot\|_\infty)$  for an appropriate  $\gamma \in [1, 2]$  and then apply Lemma 4.1 (or, in the log-barrier case, the slightly more general Lemma C.1).

**Part 1:** As in the proof of Theorem 3.6, these distributions (with proper choice of parameters) lead to a full information GBPA that is  $\text{DiffStable}(D_\infty, \|\cdot\|_\infty)$  at level  $2\epsilon$ . In the FTPL case when  $|F(p, Z)| = |\langle p, Z \rangle| \leq \|Z\|_\infty$ , we have

$$\mathbb{E} \left[ \max_p F(p, Z) - \min_p F(p, Z) \right] \leq 2\mathbb{E}\|Z\|_\infty,$$

which scales as  $\frac{\log N}{\epsilon}$  for these distributions. Lemma 4.1 gives the expected regret bound of

$$2\epsilon \mathbb{E} \left[ \sum_{t=1}^T \hat{\ell}_{t,i_t}^2 p_{t,i_t} \right] + 2\mathbb{E}\|Z\|_\infty. \quad (9)$$

Since  $\ell_{t,i_t} \in [0, 1]$ , we have

$$\mathbb{E} \left[ \hat{\ell}_{t,i_t}^2 p_{t,i_t} \right] = \mathbb{E} \left[ \frac{\ell_{t,i_t}^2}{p_{t,i_t}^2} p_{t,i_t} \right] \leq \mathbb{E} \left[ \frac{1}{p_{t,i_t}} \right] = \mathbb{E} \left[ \sum_{i=1}^N p_{t,i} \frac{1}{p_{t,i}} \right] = N.$$

Plugging this into (9) and tuning  $\epsilon$  give us Part 1.

**Part 2:** When  $F(p) = -\eta \sum_{i=1}^N p_i \log_\alpha(1/p_i)$  for  $\alpha \in (0, 1)$ , then  $\tilde{\Phi}$  is  $(2 - \alpha, 1/(\eta\alpha))$ -differentially consistent [2]. By Proposition 3.5, the full information GBPA is  $\text{DiffStable}(D_{\infty, 2-\alpha}, \|\cdot\|_\infty)$  at level  $2/(\eta\alpha)$ . Also note that  $F(p)$  is negative and its minimum value is achieved at the uniform distribution. Therefore we can show

$$\max_p F(p) - \min_p F(p) \leq \eta \frac{\sum_{i=1}^N (1/N)^\alpha - 1}{1 - \alpha} \leq \eta \frac{N^{1-\alpha}}{1 - \alpha}.$$

Lemma 4.1 gives the expected regret bound of

$$\frac{2}{\eta\alpha} \mathbb{E} \left[ \sum_{t=1}^T \hat{\ell}_{t,i_t}^2 p_{t,i_t}^{2-\alpha} \right] + \eta \frac{N^{1-\alpha}}{1 - \alpha}. \quad (10)$$

Since  $\ell_{t,i_t} \in [0, 1]$ , we have

$$\mathbb{E} \left[ \hat{\ell}_{t,i_t}^2 p_{t,i_t}^{2-\alpha} \right] = \mathbb{E} \left[ \frac{\ell_{t,i_t}^2}{p_{t,i_t}^{2-\alpha}} p_{t,i_t}^{2-\alpha} \right] \leq \mathbb{E} [p_{t,i_t}^{-\alpha}] = \mathbb{E} \left[ \sum_{i=1}^N p_{t,i}^{1-\alpha} \right] \leq N^\alpha,$$

where the last inequality follows from the fact that the function  $p^{1-\alpha}$  is concave for  $\alpha \in (0, 1)$ . Plugging this into (10) and tuning  $\eta$  give us Part 2.

**Part 3:** When  $F(p) = -\eta \sum_{i=1}^N \log p_i$ , then  $\tilde{\Phi}$  is  $(2, 1/\eta)$ -differentially consistent (see Lemma C.4 below). By Proposition 3.5, the full information GBPA is  $\text{DiffStable}(D_{\infty, 2}, \|\cdot\|_\infty)$  at level  $2/\eta$ . Since  $F$  is non-negative, we have

$$\max_{p \in \Delta_\tau} F(p) - F(p_0) \leq \eta N \log(1/\tau).$$

Lemma C.1 gives the expected regret bound of

$$\frac{2}{\eta} \mathbb{E} \left[ \sum_{t=1}^T \hat{\ell}_{t,i_t}^2 p_{t,i_t}^2 \right] + \eta N \log(1/\tau) + \tau NT. \quad (11)$$

Since  $\ell_{t,i_t} \in [0, 1]$ , we have

$$\mathbb{E} \left[ \hat{\ell}_{t,i_t}^2 p_{t,i_t}^2 \right] = \mathbb{E} \left[ \frac{\ell_{t,i_t}^2}{p_{t,i_t}^2} p_{t,i_t}^2 \right] \leq \mathbb{E} [\ell_{t,i_t}^2] \leq \mathbb{E} [\ell_{t,i_t}].$$

Plugging this into (11) and choosing  $\tau = 1/(NT)$ , we get the following recursive inequality for the expected regret  $R_T$ :

$$R_T \leq \frac{2}{\eta} (R_T + L_T^*) + \eta N \log(NT) + 1.$$

If  $L_T^* < 2$ , set  $\eta = 4$  to get the bound  $R_T \leq 8N \log(NT) + 4$ . If  $L_T^* \geq 2$  then set  $\eta = \sqrt{2L_T^* N \log(NT)}$  and note that  $\eta > 2\sqrt{2}$  if  $N, T \geq 2$ . In this case, the bound becomes  $R_T \leq (4\sqrt{L_T^* N \log(NT)} + 1) / (\sqrt{2} - 1)$ , which completes the proof.  $\square$

### C.3 Differential consistency of GBPA potential with log barrier regularization

**Lemma C.4.** *Let  $F(p) = -\eta \sum_{i=1}^N \log p_i$ ,  $\tilde{\Phi}(L) = \min_p \langle L, p \rangle + F(p)$  and  $p(L) = \arg \min_p \langle L, p \rangle + F(p)$ . Then  $\tilde{\Phi}$  is  $(2, 1/\eta)$ -differentially consistent.*

*Proof.* We observe that straightforward calculus gives  $\nabla^2 F(p) = \eta \text{diag}(p_1^{-2}, \dots, p_N^{-2})$ . Let  $\mathbb{I}_{\Delta^{N-1}}(\cdot)$  be the indicator function of  $\Delta^{N-1}$ ; that is,  $\mathbb{I}_{\Delta^{N-1}}(x) = 0$  for  $x \in \Delta^{N-1}$  and  $\mathbb{I}_{\Delta^{N-1}}(x) = \infty$  for  $x \notin \Delta^{N-1}$ . It is clear that  $-\tilde{\Phi}(-L)$  is the dual of the function  $F(x) + \mathbb{I}_{\Delta^{N-1}}(x)$ , and moreover we observe that  $\nabla^2 F(p)$  is a *sub-Hessian* of  $F(\cdot) + \mathbb{I}_{\Delta^{N-1}}(\cdot)$  at  $p$ , following the setup of [30]. Taking advantage of Proposition 3.2 in the latter reference, we conclude that  $\nabla^{-2} F(p(-L))$  is a *super-Hessian* of  $F^* = -\tilde{\Phi}(-L)$  at  $L$ . Hence, we get

$$-\nabla^2 \tilde{\Phi}(-L) \preceq \eta^{-1} \text{diag}(p_1^2(-L), \dots, p_N^2(-L))$$

for any  $L$ . What we have stated, indeed, is that  $\tilde{\Phi}$  is  $(2, 1/\eta)$ -differentially-consistent.  $\square$

### C.4 Bandits with experts

We provide full details for the bandits with experts setting.

#### C.4.1 Helper lemmas for the analysis

**Lemma C.5.** *Suppose the full information GBPA uses a potential of the form  $\tilde{\Phi}(L) = \mathbb{E}[\min_p \langle L, p \rangle + F(p, Z)]$ . If the full information GBPA is  $\text{DiffStable}(D_\infty, \|\cdot\|_\infty)$  at level  $\epsilon$ , then the expected regret of Algorithm 3 with no clipping can be bounded as*

$$\mathbb{E} \left[ \sum_{t=1}^T \ell_{t,j_t} \right] - L_T^* \leq \epsilon \mathbb{E} \left[ \sum_{t=1}^T \hat{\ell}_{t,i_t}^2 q_{t,j_t} \right] + \mathbb{E} \left[ \max_p F(p, Z) - \min_p F(p, Z) \right].$$

We will prove this lemma by proving Lemma C.6 and Lemma C.7 below that, when combined, immediately yield the desired result.

**Lemma C.6.** *Suppose the full information GBPA uses a potential of the form  $\tilde{\Phi}(L) = \mathbb{E}[\min_p \langle L, p \rangle + F(p, Z)]$ . Then, we have*

$$\mathbb{E} \left[ \sum_{t=1}^T \ell_{t,i_t} \right] - L_T^* \leq \mathbb{E} \left[ \sum_{t=1}^T \langle p_t - p_{t+1}, \bar{\phi}_t \rangle \right] + \mathbb{E} \left[ \max_p F(p, Z) - \min_p F(p, Z) \right].$$



*Proof.* Fix the source of internal randomness used by Algorithm 3 (with no clipping) to sample  $j_t \sim q_t$ . This fixes all the estimated loss vectors  $\hat{\ell}_t$  and hence  $\bar{\phi}_t$ . The full information GBPA algorithm will deterministically generate the same sequence  $p_t$  of probabilities on this estimated loss sequence using the rule  $p_t = \nabla \bar{\Phi}(\bar{\phi}_{t-1})$ . We have

$$\sum_{t=1}^T \langle p_t, \bar{\phi}_t \rangle = \sum_{t=1}^T \langle p_t - p_{t+1}, \bar{\phi}_t \rangle + \sum_{t=1}^T \langle p_{t+1}, \bar{\phi}_t \rangle.$$

Proceeding as in the proof of Lemma C.2 gives us, for any  $p \in \Delta^{N-1}$ ,

$$\mathbb{E}[\sum_{t=1}^T \langle p_t, \bar{\phi}_t \rangle] \leq \mathbb{E}[\sum_{t=1}^T \langle p_t - p_{t+1}, \bar{\phi}_t \rangle] + \mathbb{E}[\max_p F(p, Z) - \min_p F(p, Z)] + \mathbb{E}[\sum_{t=1}^T \langle p, \bar{\phi}_t \rangle].$$

To finish the proof, first note that

$$\begin{aligned} \mathbb{E}[\sum_{t=1}^T \langle p_t, \bar{\phi}_t \rangle] &= \mathbb{E}\left[\sum_{t=1}^T \langle p_t, \phi_t(\hat{\ell}_t) \rangle\right] = \mathbb{E}\left[\sum_{t=1}^T \langle \psi_t(p_t), \hat{\ell}_t \rangle\right] \\ &= \mathbb{E}\left[\sum_{t=1}^T \langle q_t, \hat{\ell}_t \rangle\right] = \mathbb{E}\left[\sum_{t=1}^T \ell_{t,j_t}\right]. \end{aligned}$$

Second, note that, by choosing  $p = \mathbf{e}_i \in \mathbb{R}^N$ ,

$$\begin{aligned} \sum_{t=1}^T \mathbb{E}[\langle p, \bar{\phi}_t \rangle] &= \sum_{t=1}^T \mathbb{E}[\langle \mathbf{e}_i, \bar{\phi}_t \rangle] = \sum_{t=1}^T \mathbb{E}[\langle e_i, \phi_t(\hat{\ell}_t) \rangle] \\ &= \sum_{t=1}^T \mathbb{E}\left[\langle \psi_t(e_i), \hat{\ell}_t \rangle\right] = \sum_{t=1}^T \langle \psi_t(e_i), \ell_t \rangle = \sum_{t=1}^T \ell_{t,E_{i,t}}. \end{aligned}$$

Choosing  $i$  that makes the last summation equal to  $L_T^*$  completes the proof.  $\square$

**Lemma C.7.** *If the full information GBPA is DiffStable( $D_\infty, \|\cdot\|_\infty$ ) at level  $\epsilon$ . Then, we have*

$$\langle p_t - p_{t+1}, \bar{\phi}_t \rangle \leq \epsilon \hat{\ell}_{t,j_t}^2 q_{t,j_t}.$$

*Proof.* Because of the stability assumption, we know that  $D_{\infty,\gamma}(p_t, p_{t+1}) \leq \epsilon \|\bar{\phi}_t\|_\infty = \epsilon \|\hat{\ell}_t\|_\infty = \epsilon \hat{\ell}_{t,j_t}$ . Therefore, for any  $i \in [N]$ ,

$$p_{t+1,i} \geq p_{t,i} \exp(-\epsilon \hat{\ell}_{t,j_t}) \geq p_{t,i} (1 - \epsilon \hat{\ell}_{t,j_t}).$$

Now we have

$$\begin{aligned} \langle p_t - p_{t+1}, \phi_t(\hat{\ell}_t) \rangle &= \sum_{i:E_{i,t}=j_t} (p_{t,i} - p_{t+1,i}) \hat{\ell}_{t,j_t} \leq \sum_{i:E_{i,t}=j_t} (\epsilon \hat{\ell}_{t,j_t} p_{t,i}) \hat{\ell}_{t,j_t} \\ &= \epsilon \hat{\ell}_{t,j_t}^2 \sum_{i:E_{i,t}=j_t} p_{t,i} = \epsilon \hat{\ell}_{t,j_t}^2 q_{t,j_t}. \end{aligned} \quad \square$$

## C.4.2 Regret bound and analysis

**Theorem 4.3** (Zero-order and first-order regret bounds for bandits with experts). *Algorithm 3 enjoys the following bounds when used with different perturbations such as Gamma, Gumbel, Fréchet, Weibull, and Pareto (with a proper choice of parameters).*

1. *With no clipping, it achieves near optimal expected regret of  $O(\sqrt{KT \log N})$ .*
2. *With clipping, it achieves expected regret of  $O\left((K \log N)^{1/3} (L_T^*)^{2/3}\right)$ .*

*Proof.* The proof of Part 1 is very similar to the proof of Part 1 of Theorem 4.2. Part 2 needs a few more arguments to take care of the effects of clipping.

**Part 1:** Note that without clipping, i.e., when  $\rho = 0$ , we have  $q_t = \tilde{q}_t$  for all  $t$ . As in the proof of Theorem 3.6, these distributions (with proper choice of parameters) lead to a full information GBPA that is DiffStable( $D_\infty, \|\cdot\|_\infty$ ) at level  $2\epsilon$ . In the FTPL case when  $|F(p, Z)| = |\langle p, Z \rangle| \leq \|Z\|_\infty$ , we have

$$\mathbb{E} \left[ \max_p F(p, Z) - \min_p F(p, Z) \right] \leq 2\mathbb{E}\|Z\|_\infty,$$

which scales as  $\frac{\log N}{\epsilon}$  for these distributions. Lemma C.5 gives the expected regret bound of

$$2\epsilon \mathbb{E} \left[ \sum_{t=1}^T \hat{\ell}_{t,i_t}^2 p_{t,i_t} \right] + 2\mathbb{E}\|Z\|_\infty. \quad (12)$$

Since  $\ell_{t,j_t} \in [0, 1]$ , we have

$$\mathbb{E} \left[ \hat{\ell}_{t,i_t}^2 q_{t,j_t} \right] = \mathbb{E} \left[ \frac{\ell_{t,i_t}^2}{q_{t,j_t}^2} q_{t,j_t} \right] \leq \mathbb{E} \left[ \frac{1}{q_{t,j_t}} \right] = \epsilon \mathbb{E} \left[ \sum_{i=1}^K q_{t,j} \frac{1}{q_{t,j}} \right] = \epsilon K.$$

Plugging this into (12) and tuning  $\epsilon$  gives us Part 1.

**Part 2:** When there is clipping, i.e.  $\rho$  is non-zero, the loss estimate behaves differently from estimate used in the unclipped version of the algorithm. First, we have the upper bound  $\|\phi_t(\hat{\ell}_t)\|_\infty = \|\hat{\ell}_t\|_\infty \leq 1/\rho$ . Second, it is unbiased only over the support of  $\tilde{q}_t$  since outside of the support, it is deterministically zero. Therefore  $\hat{\ell}_t$ , in expectation, now *underestimates*  $\ell_t$ . Crucially, however, we still have the equality  $\mathbb{E}[\langle \tilde{q}_t, \hat{\ell}_t \rangle] = \mathbb{E}[\ell_{t,j_t}]$ .

Lemma C.6 does not directly bound regret in the clipped case. However, examining the proof, it gives us the bound,

$$\begin{aligned} & \mathbb{E} \left[ \sum_{t=1}^T \langle p_t, \phi_t(\hat{\ell}_t) \rangle \right] - \min_{i=1}^N \sum_{t=1}^T \mathbb{E} \left[ \langle \psi_t(e_i), \hat{\ell}_t \rangle \right] \\ & \leq \mathbb{E} \left[ \sum_{t=1}^T \langle p_t - p_{t+1}, \bar{\phi}_t \rangle \right] + \mathbb{E} \left[ \max_p F(p, Z) - \min_p F(p, Z) \right]. \end{aligned} \quad (13)$$

We will now relate the LHS to regret and bound the RHS.

First, note that

$$\mathbb{E} \left[ \sum_{t=1}^T \langle p_t, \phi_t(\hat{\ell}_t) \rangle \right] = \mathbb{E} \left[ \sum_{t=1}^T \langle q_t, \hat{\ell}_t \rangle \right] \geq (1 - K\rho) \mathbb{E} \left[ \sum_{t=1}^T \langle \tilde{q}_t, \hat{\ell}_t \rangle \right] = (1 - K\rho) \mathbb{E} \left[ \sum_{t=1}^T \ell_{t,j_t} \right] \quad (14)$$

where the inequality follows because  $\hat{\ell}_t$  has all non-negative entries and  $\tilde{q}_{t,j}$  is either 0 or we have

$$\tilde{q}_{t,j} = \frac{q_{t,j}}{1 - \sum_{j': q_{t,j'} < \rho} q_{t,j'}} \leq \frac{q_{t,j}}{1 - K\rho}.$$

Second, note that, because  $\hat{\ell}_t$  underestimates  $\ell_t$ , we have

$$\mathbb{E} \left[ \sum_{t=1}^T \phi_{t,i}(\hat{\ell}_t) \right] = \sum_{t=1}^T \mathbb{E}[\langle e_i, \phi_t(\hat{\ell}_t) \rangle] = \sum_{t=1}^T \mathbb{E}[\langle \psi_t(e_i), \hat{\ell}_t \rangle] \leq \sum_{t=1}^T \langle \psi_t(e_i), \ell_t \rangle = \sum_{t=1}^T \ell_{t,E_{i,t}}. \quad (15)$$

Third, note that, as in the proof of Theorem 3.6, these distributions (with proper choice of parameters) lead to a DiffStable( $D_\infty, \|\cdot\|_\infty$ ) full information GBPA at level  $2\epsilon$ . In the FTPL case, when  $|F(p, Z)| = |\langle p, Z \rangle| \leq \|Z\|_\infty$ , we have

$$\mathbb{E} \left[ \max_p F(p, Z) - \min_p F(p, Z) \right] \leq 2\mathbb{E}\|Z\|_\infty \leq \frac{2 \log N}{\epsilon}. \quad (16)$$

Fourth, because of the one-step differential stability of the full information GBPA, we begin as in the proof of Lemma C.7 but use a slightly different bound towards the end of the following calculation since we now have  $\tilde{q}_{t,i} \geq \rho$ .

$$\begin{aligned} \mathbb{E} \left[ \langle p_t - p_{t+1}, \phi_t(\hat{\ell}_t) \rangle \right] &= \mathbb{E} \left[ \sum_{i: E_{i,t}=j_t} (p_{t,i} - p_{t+1,i}) \hat{\ell}_{t,j_t} \right] \leq \mathbb{E} \left[ \sum_{i: E_{i,t}=j_t} (2\epsilon \hat{\ell}_{t,j_t} p_{t,i}) \hat{\ell}_{t,j_t} \right] \\ &= \mathbb{E} \left[ 2\epsilon \hat{\ell}_{t,j_t}^2 \sum_{i: E_{i,t}=j_t} p_{t,i} \right] = \mathbb{E} \left[ 2\epsilon \frac{\ell_{t,j_t}^2}{\tilde{q}_{t,j_t}^2} \tilde{q}_{t,j_t} \right] \leq \frac{2\epsilon}{\rho} \mathbb{E} [\ell_{t,j_t}]. \end{aligned} \quad (17)$$

Combining (13), (14), (15), (16), and (17) provides

$$\mathbb{E} \left[ \sum_{t=1}^T \ell_{t,j_t} \right] - L_T^* \leq \left( \frac{2\epsilon}{\rho} + K\rho \right) \mathbb{E} \left[ \sum_{t=1}^T \ell_{t,j_t} \right] + \frac{2 \log N}{\epsilon},$$

where  $L_T^* = \min_{i=1}^N \sum_{t=1}^T \ell_{t,E_{i,t}}$ . Denoting the expected regret by  $R_T$ , we therefore have the bound

$$R_T \leq \left( \frac{2\epsilon}{\rho} + K\rho \right) (R_T + L_T^*) + \frac{2 \log N}{\epsilon}.$$

We first set  $\rho = \sqrt{2\epsilon/K}$  which is a valid choice as long as  $2\epsilon K < 1$ . With this choice, we have the bound

$$R_T \leq 2\sqrt{2\epsilon K} (R_T + L_T^*) + \frac{2 \log N}{\epsilon}.$$

If  $L_T^* \leq 128K \log N$ , set  $\epsilon = 1/32K$  to get a bound of  $R_T \leq L_T^* + 128K \log N \leq 256K \log N$ . If  $L_T^* > 128K \log N$ , set  $\epsilon = (\log N)^{2/3} / (K^{1/3} (L_T^*)^{2/3})$  to get a bound of  $O(K^{1/3} (\log N)^{2/3} (L_T^*)^{2/3})$ . Note that in this case  $\epsilon K < 1/32$ .

□
